# Supplementary material for: Resistant Starches Types 2 and 4 Have Differential Effects on the Composition of the Fecal Microbiota in Human Subjects
Source: PLOS journal article supplement (doi:10.1371/journal.pone.0015046), 2010-11-29

A

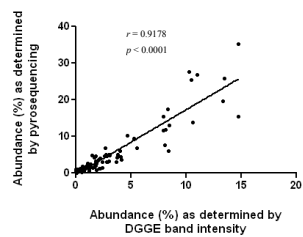

B

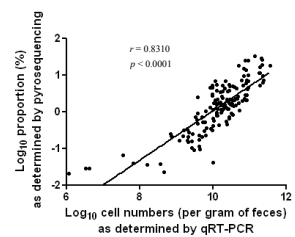

Supplement: S7 (10.1371/journal.pone.0015046.s007) [file journal.pone.0015046.s007]
